# Supplementary material for: Enhancement of thermal stability for perovskite solar cells through cesium doping
Source: Royal Society of Chemistry journal article supplement (doi:10.1039/c6ra28501e), 2017-01-01
Supplement: c6ra28501e1.pdf [file c6ra28501e1.pdf]

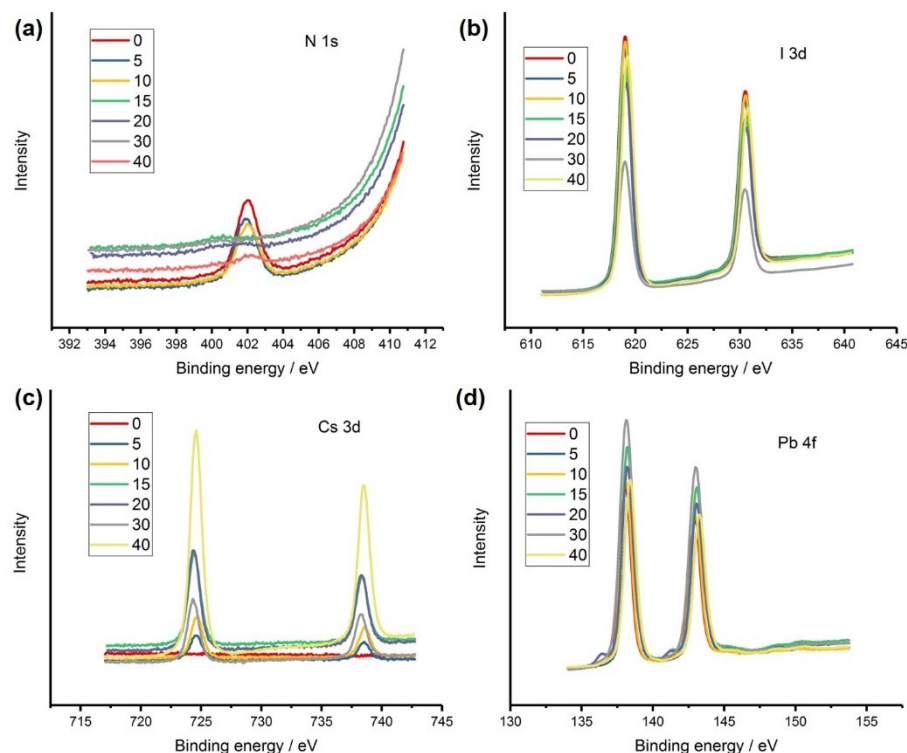

Figure S1. Original XPS spectra for perovskite films with different compositions.

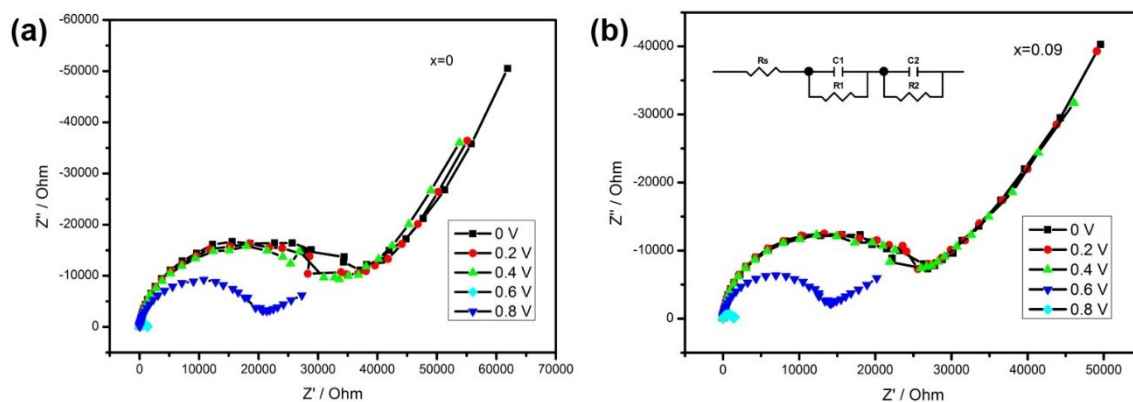

Figure S2. (a) impedance spectra of perovskite solar cells with MAPbI<sub>3</sub> (a) and Cs<sub>0.09</sub>MA<sub>0.91</sub>PbI<sub>3</sub> (b) as absorbers. the equivalent circuit for fitting was shown in the inset.

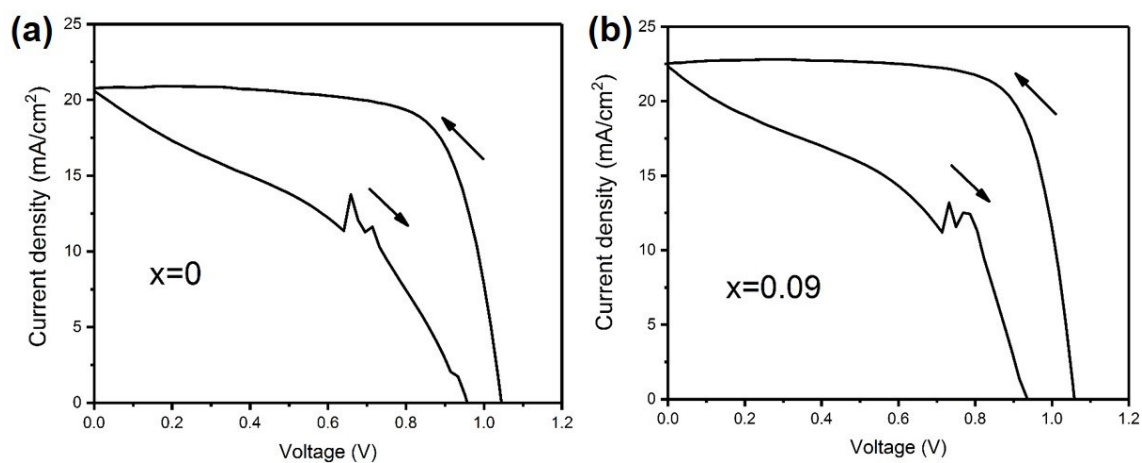

Figure S3. Hysteresis effect of perovskite solar cells with MAPbI<sub>3</sub> (a) and Cs<sub>0.09</sub>MA<sub>0.91</sub>PbI<sub>3</sub> (b) as absorbers.
